# Supplementary material for: How to perform Contrast-Enhanced Ultrasound (CEUS)
Source: PubMed Central journal article supplement — Ultrasound Int Open. 2018 Feb 7;4(1):E2–E15. doi: 10.1055/s-0043-123931 (PMC5802984; doi:10.1055/s-0043-123931), 2018-02-07
Supplement: 10-1055-s-0043-123931-0136-0001.pdf [file 10-1055-s-0043-123931-0136-0001.pdf]

## How to perform Contrast-Enhanced Ultrasound (CEUS)

### Conflict of Interest, COI

Some authors declare conflicts of interest:

#### **Christoph F Dietrich**

Speaker honoraria, Bracco, Hitachi, GE, Mindray, Supersonic, Pentax.  
Advisory Board Member, Hitachi and Mindray.  
Research grant, Bracco, Hitachi, GE, Siemens, Olympus.

#### **Maria Franca Meloni**

Speaker honoraria, Bracco

#### **John R. Eisenbrey**

Research, equipment, and contrast agent support from GE Healthcare.  
Contrast agent support from Lantheus Medical Imaging.  
Equipment support from Siemens and Toshiba.  
Research support from GlascoSmithKline

#### **Vito Cantisani**

Speaker honoraria, Bracco, Samsung, Toshiba.

#### **Odd Helge Gilja**

Speaker honoraria, AbbVie, Bracco, Almirall, GE Healthcare, Takeda AS, Meda AS, Ferring AS and Allergan  
Consultant for Bracco, GE Healthcare, and Samsung

#### **Yuko Kono**

GE Healthcare: equipment loan  
Canon Medical Systems Co.: equipment loan  
Lantheus Medical Imaging: contrast agent support

#### **Fabrizio Calliada**

Speaker for Hitachi Medical System, Mindray Shenzhen Medical System, Toshiba Medical System.
